# Supplementary material for: Toe grip force of the dominant foot is associated with fall risk in community-dwelling older adults: a cross-sectional study
Source: J Foot Ankle Res. 2022 May 30;15:42. doi: 10.1186/s13047-022-00548-1 (PMC9150341; doi:10.1186/s13047-022-00548-1)
Supplement: Supplementary file 1 — Additional file 1. [file 13047_2022_548_MOESM1_ESM.xlsx]

## Sheet: Sheet1
										Two-point discrimination sensory							Quadriceps femoris muscle strength				Toe grip force
	Age (years)	Sex	Height	Weight	BMI (kg/m2)	MMSE	Number of falls	Fall history	Dominant foot	Thenar of dominant foot	Heel of dominant foot	Thenar of non-dominant foot	Heel of non-dominant foot	Thenar asymmetry	Heel asymmetry		Dominant foot	Non-dominant foot	Asymmetry		Dominant foot	Non-dominant foot	Asymmetry
	66	male	178	76.2	24	30	0	Not available	right	17.65	22.6	18	23.85	2	5.5		2.47	2	-19		46.8	45.2	-3.4
	63	female	146.5	43.3	20.2	26	0	Not available	right	27.15	24.05	24.65	23.9	10.1	0.6		1.74	1.66	-4.7		29.9	23.6	-21.2
	72	female	156	45.7	18.8	27	0	Not available	right	14.85	25.25	14.65	18.35	1.4	37.6		2.23	2.12	-5.2		41.7	38.7	-7.1
	66	female	151	62.2	27.3	29	0	Not available	right	22.85	24.4	21.35	25.15	7	3.1		1.58	1.48	-6.3		23.4	20.6	-12
	69	female	160	55.85	21.8	30	0	Not available	right	11.95	14.25	10.8	14.95	10.6	4.9		1.12	1.08	-2.9		26.9	23.7	-11.7
	69	female	144	57.15	27.6	30	0	Not available	right	11	17.75	14.05	18.1	27.7	2		1.08	0.89	-17.9		23.2	26.4	-12.3
	66	female	165.5	57.05	20.8	30	0	Not available	right	19.35	29.6	18.7	39.35	3.5	32.9		1.23	1.25	-1.6		18.1	16.8	-7.2
	76	male	160	53	20.7	29	0	Not available	left	18.8	20	16.35	20.35	15	1.8		1.13	1.02	-10.2		20.5	21.3	-4
	69	female	153	53.9	23	30	0	Not available	right	18.35	14.7	14.05	22.9	30.6	55.8		1.42	1.53	-7.8		40.7	40.4	-0.7
	75	male	163	62.45	23.5	30	0	Not available	right	6.15	10.4	10.4	12.15	69.1	16.8		1.25	1.05	-16.3		36.3	42.4	-14.3
	73	male	175	69.05	22.5	26	0	Not available	right	30.85	33.85	32.35	33.25	4.9	1.8		1.17	1.13	-3.2		26.4	20.2	-23.6
	67	male	170	73.65	25.5	30	1	Available	left	22.3	30.5	19.7	28.55	13.2	6.8		1.34	1.09	-19		25.3	25.3	-0.3
	74	female	142	42.85	21.3	30	0	Not available	right	12.7	15	15.75	13.95	24	7.5		1.04	1.06	-1.8		25.9	26.4	-1.8
	65	male	165	64.5	23.7	29	0	Not available	right	12.25	8	13.35	15.5	9	93.8		1.33	1.26	-5.8		49.8	36.3	-27.1
	71	female	157	51.15	20.8	29	0	Not available	right	20.3	20.25	18.55	19.9	9.4	1.8		0.94	1.05	-10.9		27.3	27.7	-1.4
	87	male	158	62.3	25.3	27	0	Not available	right	33.1	33.9	33.45	33.45	1.1	1.3		1.13	1.15	-1.7		12.4	13.1	-5.5
	63	female	156	51.4	21.1	30	0	Not available	right	17.7	17.6	21	25.7	18.6	46		1.42	1.17	-17.5		21.1	18.2	-13.8
	71	male	160	53.2	20.8	28	0	Not available	right	19.7	23.35	20.2	23.7	2.5	1.5		2	1.87	-6.5		55.9	56.9	-1.7
	75	female	159	55.45	21.9	27	1	Available	right	13.4	14.75	15.05	22.65	12.3	53.6		1.14	1.07	-6.5		18	17.5	-3
	81	female	153	55	23.5	25	0	Not available	right	19.85	21.6	27.5	15.75	38.5	37.1		0.89	0.68	-24		12.2	10.7	-11.9
	79	male	165	55.45	20.4	29	0	Not available	right	14.75	38.25	15.4	33.7	4.4	13.5		1.08	0.81	-25.1		17.1	18.3	-6.4
	75	male	169	70.95	24.8	29	0	Not available	right	15.45	17.75	16.4	20.75	6.1	16.9		1.19	1.31	-9		27.4	23.3	-14.9
	73	female	150	45	20	30	0	Not available	right	18.1	20.5	17.95	34.5	0.8	68.3		1.41	1.2	-14.9		30	25.3	-15.6
	63	female	155	55.65	23.2	30	0	Not available	right	8.65	10.75	12.1	12.25	39.9	14		1.4	1.7	-18		37.3	34.5	-7.5
	81	male	171	60.2	20.6	30	0	Not available	left	7.75	39.8	15.5	39.15	100	1.7		1.33	1.56	-14.6		22.3	19	-14.9
	82	female	149.5	56.75	25.4	30	0	Not available	right	10.5	22.4	10.3	26.55	1.9	18.5		1.45	1.06	-27.3		18.9	15.5	-17.8
	81	male	167	63.4	22.7	30	0	Not available	right	10.4	11.35	11.35	11.2	9.1	1.3		1.35	1.12	-16.7		25.2	20.7	-17.8
	67	female	149	42.95	19.3	30	0	Not available	right	22.8	18.3	24.55	20.05	7.7	9.6		1.54	1.43	-7		31.8	43.4	-26.8
	71	female	152	54.1	23.4	29	2	Available	right	24.9	35.9	21.7	35.75	14.7	0.4		0.55	0.59	-6.5		8.3	5.9	-28.9
	67	female	149	38.15	17.2	28	1	Available	right	14.95	13	16.05	23.4	7.4	80		1.12	1.28	-12.1		21.1	28.2	-25.1
	75	male	171	70.6	24.1	30	0	Not available	right	14.85	37.3	21.7	20.15	46.1	85.1		1.09	0.6	-45.2		10.8	14.7	-26.9
	70	female	150	43.7	19.4	29	0	Not available	right	13.35	12.55	14.05	17.15	5.2	36.7		1.43	1.38	-3.7		37.9	38.2	-0.9
	72	female	156	42.3	17.4	29	1	Available	right	24.45	38.5	11.5	32.5	112.6	18.5		1.08	0.9	-17		14.2	12.1	-15
	78	female	152	49.7	21.5	28	1	Available	right	15.2	16.1	11.65	24.35	30.5	51.2		1.18	1.02	-13.3		10.7	14.4	-25.9
	70	male	167	67.75	24.3	27	0	Not available	right	14.7	30.3	14.95	27.75	1.7	9.2		1.1	0.87	-20.7		17.9	19.3	-6.9
	70	female	162	48.7	18.6	30	0	Not available	right	21.65	26.05	17.35	20.65	24.8	26.2		1.54	1.3	-15.9		32.8	23.9	-27
	70	male	160	55.75	21.8	29	0	Not available	right	16.5	25.35	15.05	18.45	9.6	37.4		0.72	0.68	-4.9		16.3	12.8	-21.4
	66	male	172	58.05	19.6	30	0	Not available	right	15	28.5	15.85	28	5.7	1.8		1.05	1.05	0		10.4	11.8	-11.7
	79	male	169	63.7	22.3	24	3	Available	right	23.05	34.9	19.15	37.55	20.4	7.6		2.29	1.9	-17.1		32.4	33.9	-4.4
	69	male	173	76.2	25.5	30	0	Not available	right	14.95	14.2	15.8	49.6	5.7	249.3		1.72	1.79	-4.1		38.8	24	-38.2
	70	male	168	55.45	19.6	30	0	Not available	right	17.4	20.05	15.8	13.5	10.1	48.5		1.15	1.1	-4.2		38.8	36.2	-6.7
	66	male	166	53.6	19.5	29	0	Not available	right	24.15	45.5	22	44.65	9.8	1.9		1.04	0.84	-18.9		27.3	22.6	-17.4
	60	female	153	69.45	29.7	30	0	Not available	right	27.2	26.3	24.6	22.95	10.6	14.6		1.42	1.15	-19.5		26.1	15.9	-39.1
	78	male	171	73.65	25.2	30	0	Not available	right	24.35	15.55	25.05	9.25	2.9	68.1		1.25	1.06	-15.6		15.2	17.5	-13.2
	74	male	169	67	23.5	29	0	Not available	right	17.15	21.1	14.5	21.3	18.3	0.9		1.18	1.15	-2.8		20.2	14.7	-27.3
	79	female	153	68.1	29.1	28	0	Not available	right	9.95	20	11.3	15.45	13.6	29.4		0.95	1	-4.7		21.5	20.6	-4.4
	68	female	156	47.05	19.3	26	0	Not available	right	8.55	13.75	11.7	17.75	36.8	29.1		1.61	1.47	-8.6		42.2	42	-0.5
	80	male	165	56.35	20.7	30	1	Available	right	12.15	14.9	11.8	16.55	3	11.1		1.31	1.22	-7.1		12.2	16.2	-25.1
	78	female	145	38.4	18.3	26	0	Not available	right	11.15	15.35	11.7	11.25	4.9	36.4		1.5	1.46	-2.3		22.4	22.9	-2.3
	66	female	152	45.9	19.9	30	0	Not available	right	13.4	23.25	14.3	19.75	6.7	17.7		0.92	0.95	-3		12.7	27.7	-53.9
	67	female	163	63.5	23.9	28	0	Not available	right	11.85	10.3	17	11	43.5	6.8		1.08	1.15	-5.7		12.4	13.5	-8.1
	71	male	176	76.25	24.6	30	0	Not available	right	14.75	16.6	15.85	18.05	7.5	8.7		1.43	1.32	-7.8		33.4	28.4	-15.1
	69	male	171	72.65	24.8	30	0	Not available	right	10.75	14.55	17.25	14.95	60.5	2.7		1.05	1.06	-1.3		21.6	22	-1.6
	68	female	151.5	61.7	26.9	27	0	Not available	left	15.35	21.85	18.25	21.9	18.9	0.2		0.83	1.05	-20.3		18.5	17	-7.9
